# Supplementary material for: Characterizing photochemical ageing processes of microplastic materials using multivariate analysis of infrared spectra
Source: Royal Society of Chemistry journal article supplement (doi:10.1039/d1em00392e), 2021-12-08
Supplement: d1em00392e1.pdf [file d1em00392e1.pdf]

## Supporting Information

### **Characterizing photochemical ageing processes of microplastic materials using multivariate analysis of infrared spectra**

Misha Zvekic<sup>1</sup>, Larissa C. Richards<sup>1,2</sup>, Christine C. Tong<sup>1</sup>, Erik T. Krogh<sup>\*1,2</sup>

<sup>1</sup>Applied Environmental Research Laboratories (AERL), Department of Chemistry, Vancouver Island University, 900 Fifth Street, Nanaimo, British Columbia, Canada

<sup>2</sup>Department of Chemistry, University of Victoria, PO Box 1700, Stn CSC, Victoria, British Columbia, Canada

\* Corresponding author: Erik T. Krogh, Applied Environmental Research Laboratories, Department of Chemistry, Vancouver Island University, [Erik.Krogh@viu.ca](mailto:Erik.Krogh@viu.ca)

Supporting Information contains 14 pages including Figures S1 – S10 and Tables S1 – S4.

Information includes supplier details on plastics used, spectral distribution and intensities of light treatments, photographs, summary of outdoor sunlight exposure data, assignment of IR spectral features identified by PC loadings, and additional PCA and CI results not included in the main document.

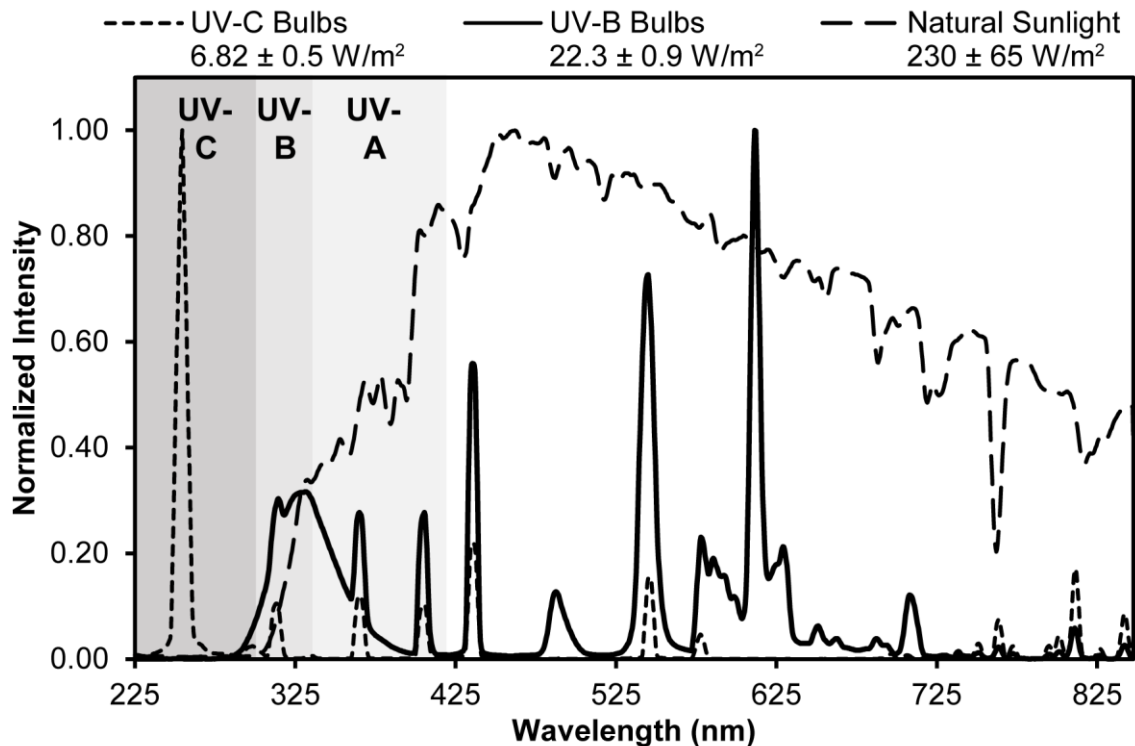

**Figure S1.** Normalized irradiance spectra and measured irradiance (W/m<sup>2</sup>) ( $n \geq 4$  measurements) of the three weathering light sources: UV-C (254 nm) mercury vapour bulbs, UV-B bulbs (ExoTerra PT2189), and the outdoor solar spectrum on an overcast day. The measured intensities of the light sources are listed, with the natural sunlight being an average daily value recorded by the Vancouver Island School-Based Weather Station Network (VISN) in Nanaimo (Ecole Hammond Bay Elementary)<sup>1</sup> over the course of the weathering period.

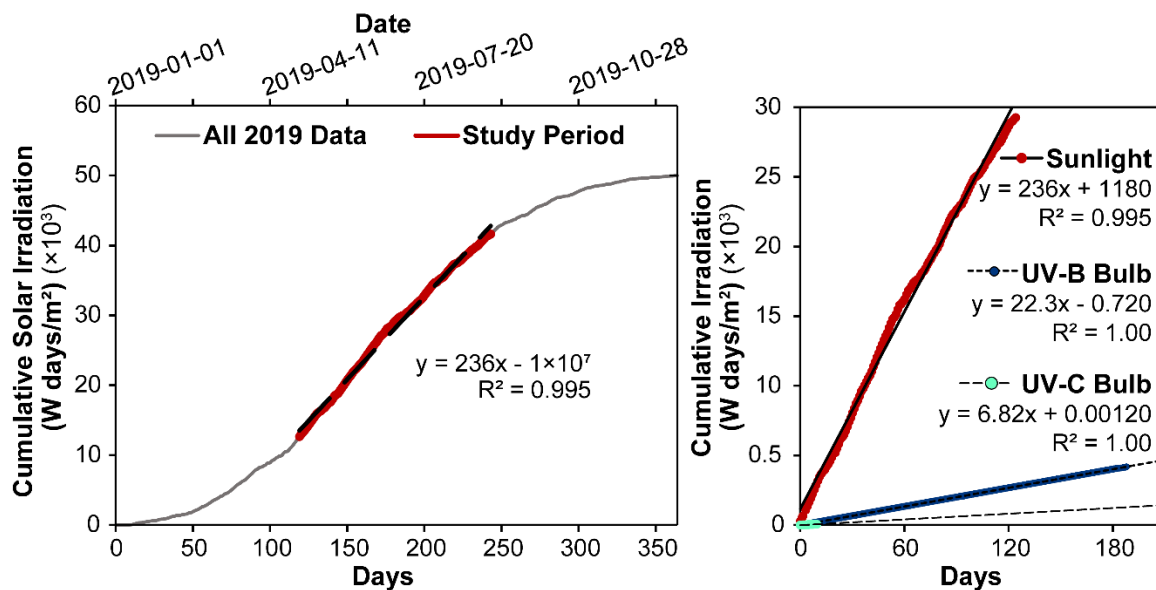

**Figure S2.** Left – Cumulative solar irradiation (W days/m<sup>2</sup>) in Nanaimo as recorded by the VISN (Ecole Hammond Bay Elementary)<sup>1</sup> over the course of 2019 (grey) and during the study period (red). Right – Comparison of cumulative irradiation of sunlight (red) and the artificial UV-B (dark blue) and UV-C (light teal) light sources over the course of their exposure periods in days.

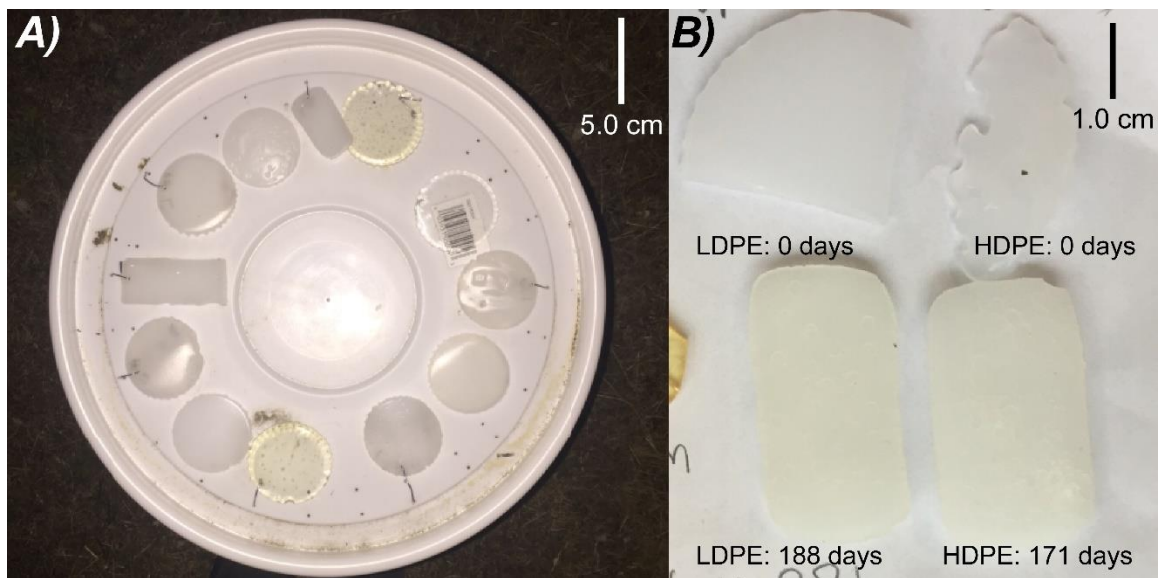

**Figure S3.** Photos of A) plastics weathering outdoors, and B) comparison of low-density polyethylene (LDPE) and high-density polyethylene (HDPE) before and after UV-B weathering.

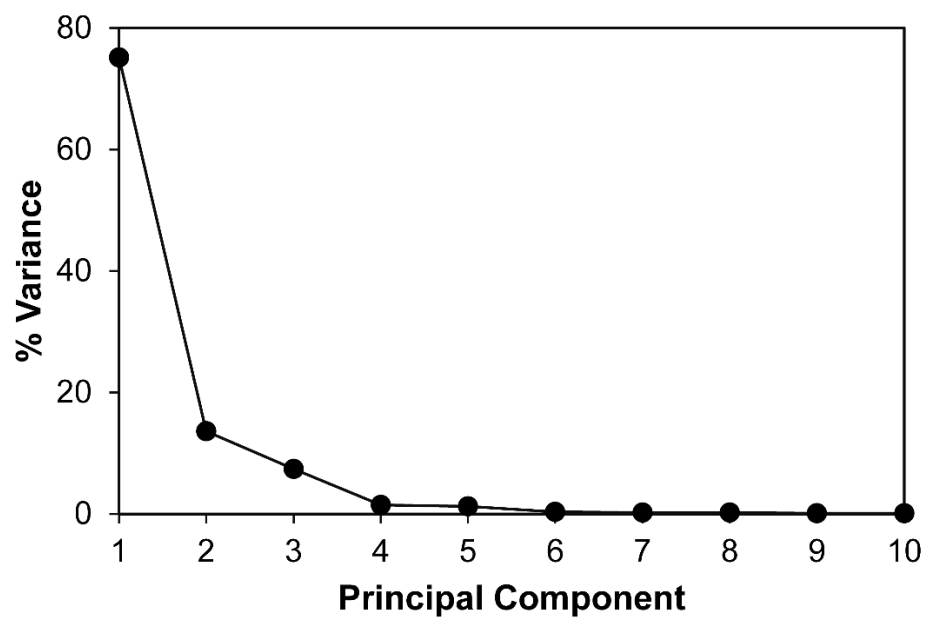

**Figure S4.** Scree plot illustrating the percent variance described by the first 10 principal components (PCs) in the principal component analysis (PCA). The first 3 PCs account for 96.2% of variance with each subsequent PC describing less than 1.5% of the remaining variance.

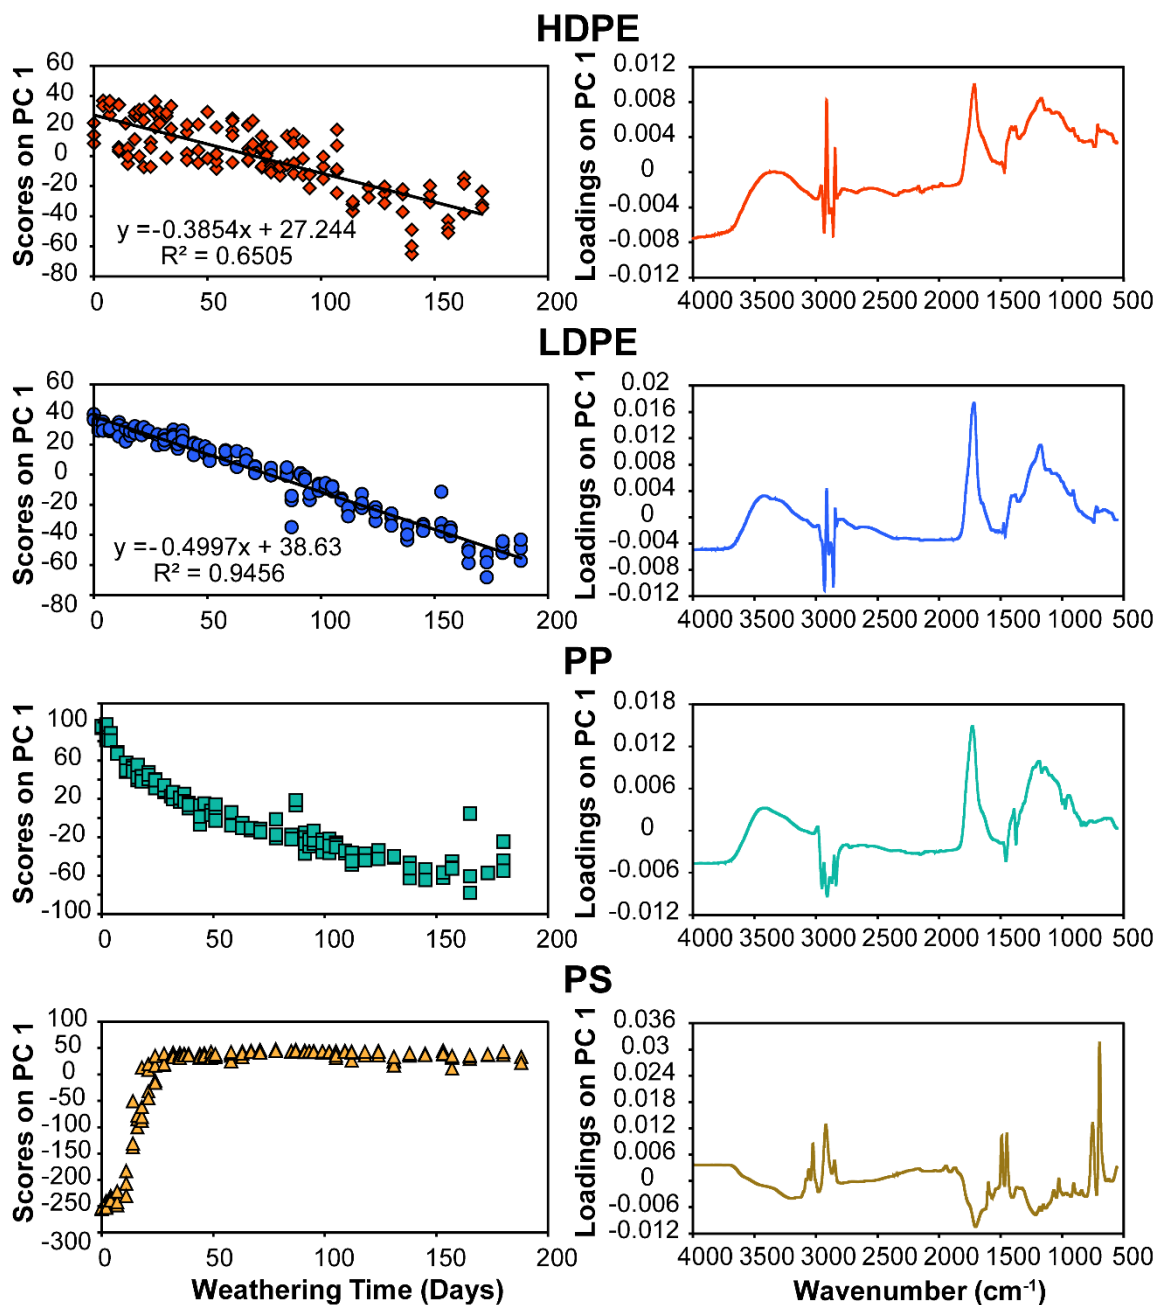

**Figure S5.** PCA applied to pristine and UV-B weathered spectra individually for each type of plastic; high-density polyethylene (HDPE), low-density polyethylene (LDPE), polypropylene (PP), and polystyrene (PS).

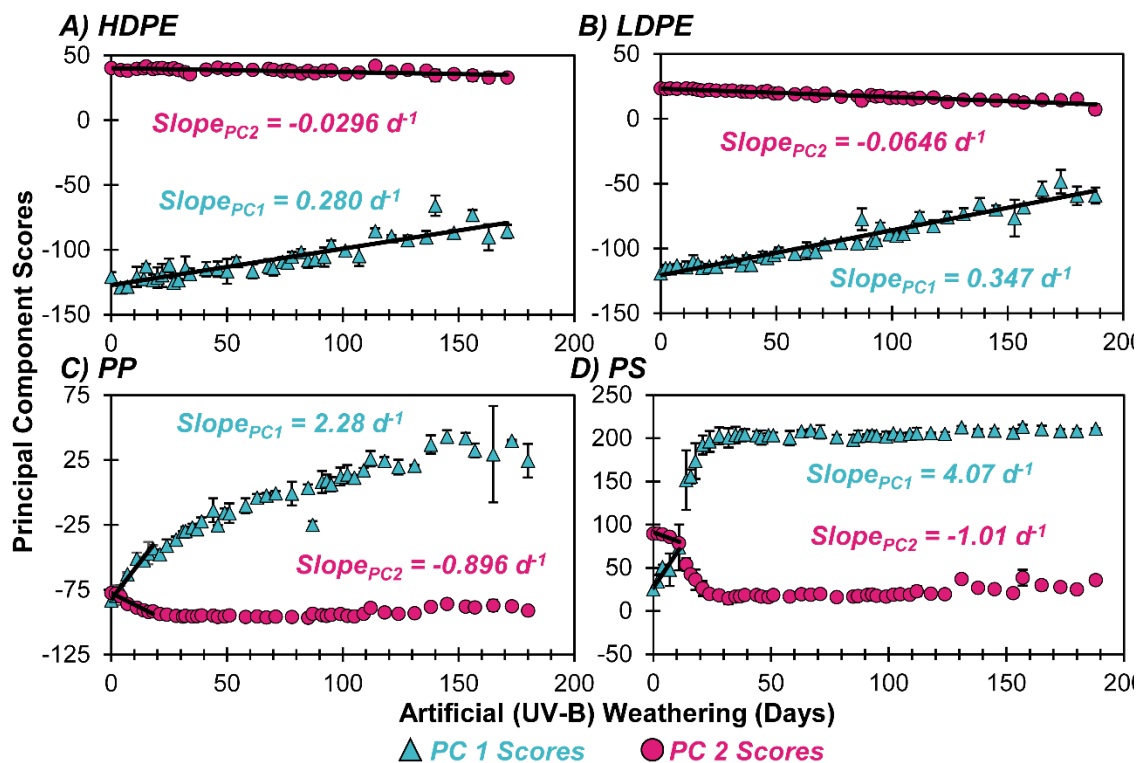

**Figure S6.** Changes in PC 1 (teal triangles) and PC 2 (pink circles) scores for A) HDPE), B) LDPE, C) PP, and D) PS over *ca.* six months of photochemical ageing under artificial UV-B lights. Equations for the linear fits for LDPE and HDPE over the full course of exposure, PP over the first 18 days, and PS over the first 11 days are included.

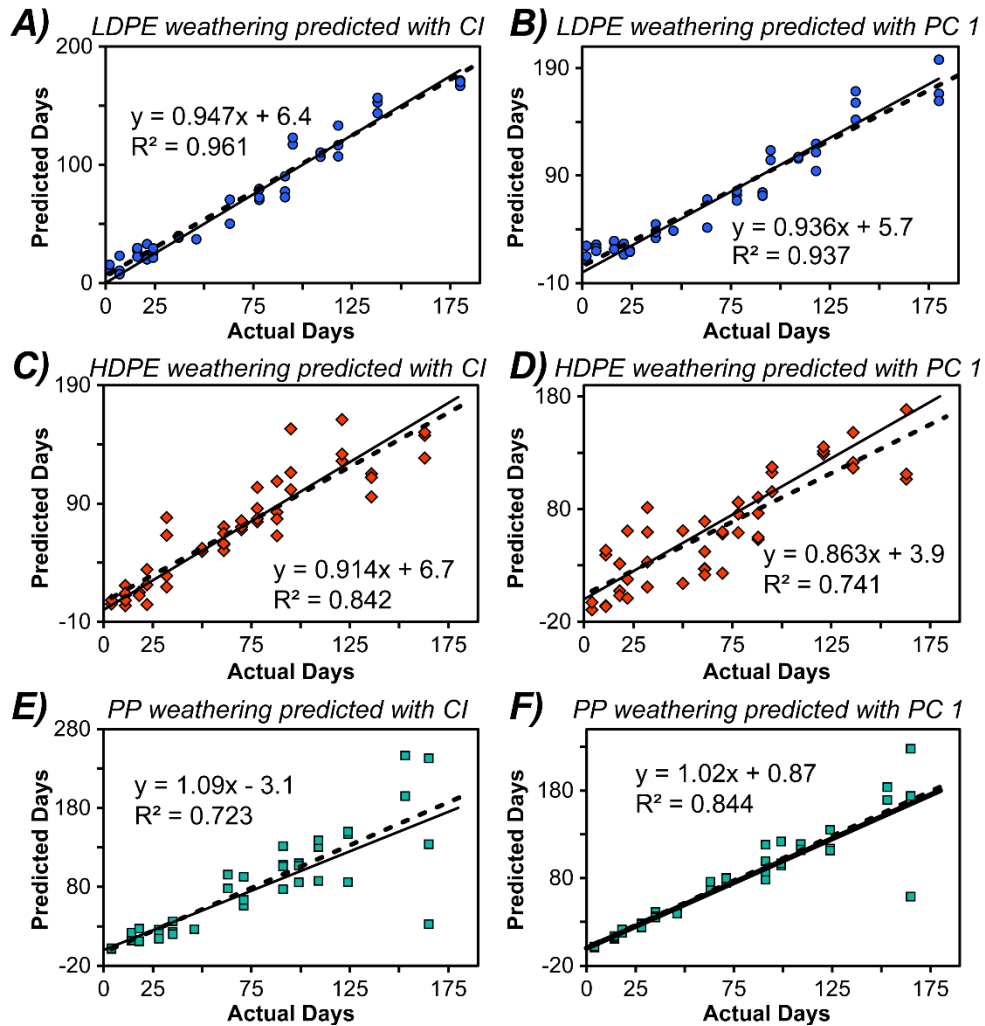

**Figure S7.** Predicting LDPE (A and B), HDPE (C and D), and PP (E and F) weathering under UV-B lights with CI (left) and PCA (right) by comparing predicted days of UV-B weathering against the actual days of UV-B weathering. The dotted lines represent the trendline through the data and the solid line is the line of equality ( $x=y$ ).

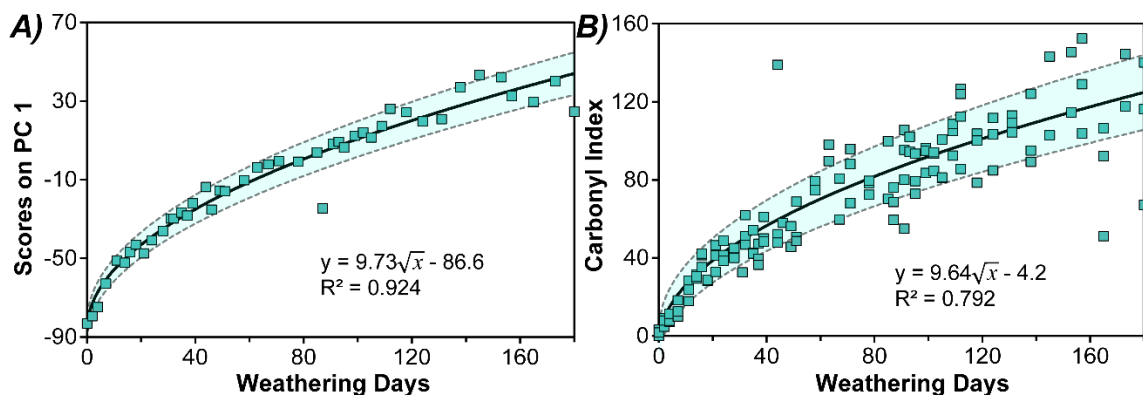

**Figure S8.** Trendlines through polypropylene scores on PC 1 (A) and carbonyl index (B). The boundaries of the 95% confidence intervals for the trendlines are represented as dashed lines.

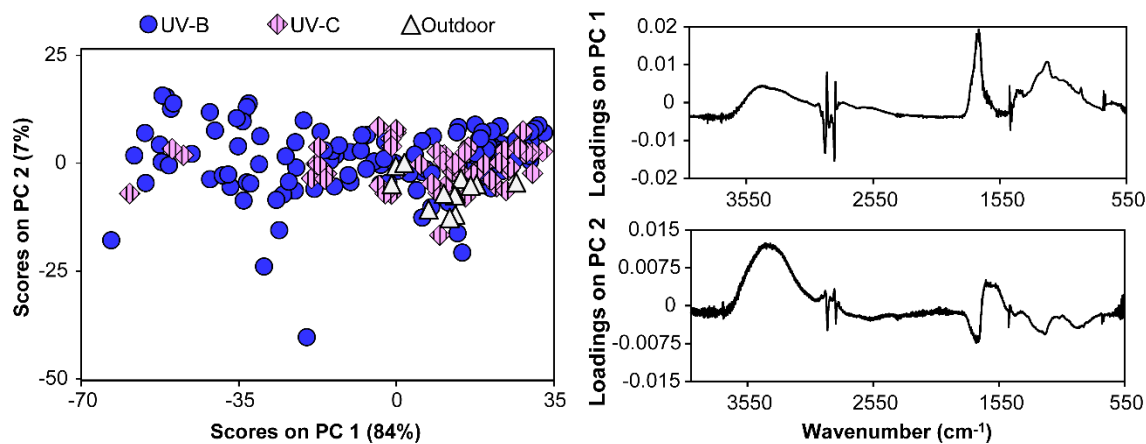

**Figure S9.** Left – PCA Scores plot for all LDPE samples with different weathering treatments (blue circles UV-B weathered, light grey triangles naturally weathered, pink striped diamonds UV-C weathered). Right – PCA Loadings plots for LDPE samples with all weathering treatments.

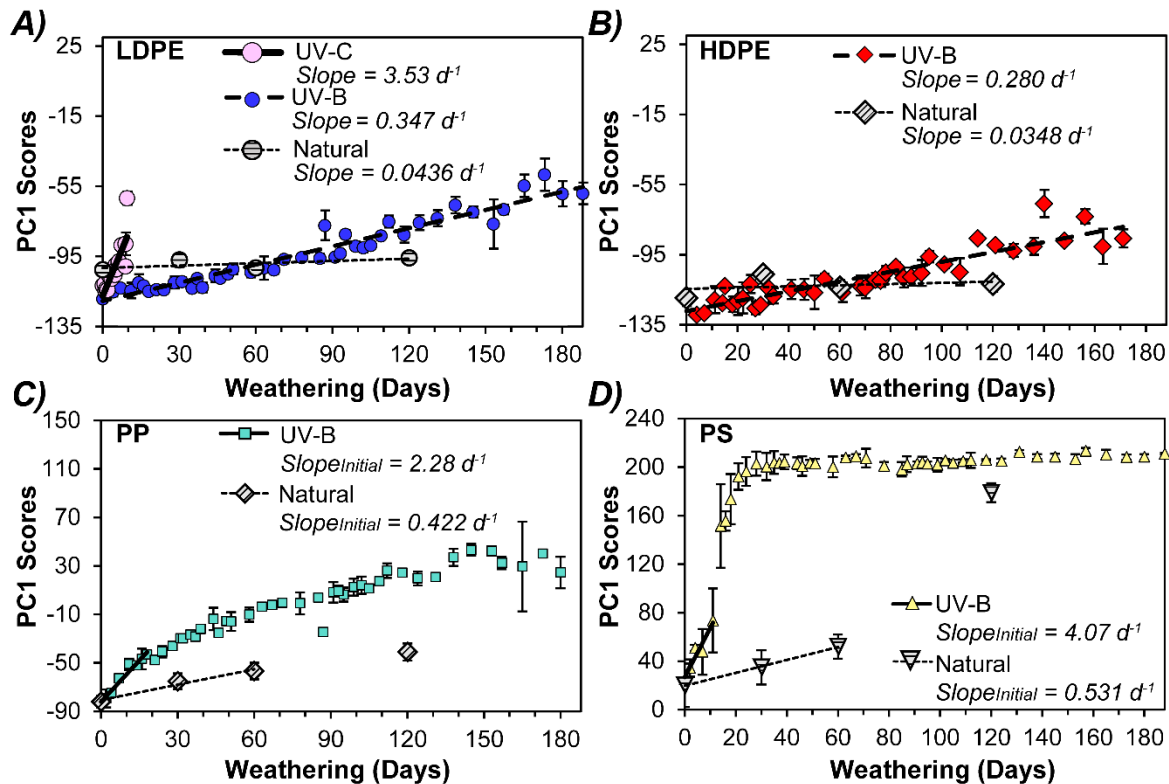

**Figure S10.** PC 1 scores over time for A) LDPE (blue UV-B weathered, grey striped naturally weathered, light pink UV-C weathered), B) HDPE (red UV-B weathered, grey striped naturally weathered), C) PP (teal UV-B weathered, grey striped naturally weathered), and D) PS (yellow UV-B weathered, grey striped naturally weathered).

**Table S1.** Manufacturer-provided properties of microplastics

| Plastic Type <sup>†</sup>                     | LDPE                                      | HDPE                            | PS                       | Isotactic PP                         |
|-----------------------------------------------|-------------------------------------------|---------------------------------|--------------------------|--------------------------------------|
| CAS #                                         | 9002-88-4                                 | 9002-88-4                       | 9003-53-6                | 9003-07-0                            |
| CAT #                                         | 428043                                    | 547999                          | 430102                   | 427888                               |
| Form                                          | Pellets                                   | Pellets                         | Beads or Pellets         | Pellets                              |
| Melt Index<br>(g/10 min)                      | 25<br>(190 °C/2.16 kg)                    | 2.2<br>(190 °C/2.16 kg)         | 6.0-9.0<br>(200 °C/5 kg) | 12<br>(230 °C/2.16 kg)               |
| Density<br>(g/mL at<br>25 °C)                 | 0.925<br>(0.9215 – 0.9255)                | ---                             | ---                      | 0.9                                  |
| Softening Point<br>(°C) <sup>§</sup>          | 93                                        | 123                             | 107                      | ---                                  |
| Melting Point<br>(°C)                         | 116                                       | ---                             | ---                      | 160-165                              |
| Hardness                                      | ---                                       | 65<br>(Shore D,<br>ASTM D 2240) | ---                      | 100<br>(Rockwell R,<br>ASTM D 785-A) |
| Impact<br>Strength                            | 45.4 J/m<br>(Izod, ASTM D<br>256, –50 °C) | ---                             | ---                      | ---                                  |
| Average<br>Molecular<br>Weight (Mw)           | ---                                       | ---                             | ~192,000                 | ~250,000                             |
| Number<br>Average<br>Molecular<br>Weight (Mn) | ---                                       | ---                             | ---                      | ~67,000                              |
| Refractive<br>Index                           | ---                                       | ---                             | n20/D 1.59               | ---                                  |

<sup>†</sup> Values reported by Sigma Aldrich<sup>§</sup> Vicat, ASTM D 1525

**Table S2.** Relative energy and intensity outputs of the light sources employed

| Wavelength range          | UV-B Bulbs<br>(n = 4) <sup>†</sup> |                             | UV-C Bulbs<br>(n = 9) |               | Sunlight<br>(n = 39) |                 |
|---------------------------|------------------------------------|-----------------------------|-----------------------|---------------|----------------------|-----------------|
|                           | Intensity <sup>§</sup><br>(%)      | Energy <sup>§§</sup><br>(%) | Intensity<br>(%)      | Energy<br>(%) | Intensity<br>(%)     | Energy<br>(%)   |
| UV-C<br>(225-280 nm)      | Not <sup>‡</sup><br>detected       | Not<br>detected             | 51 ± 2                | 77 ± 1        | Not<br>detected      | Not<br>detected |
| UV-B<br>(280-315 nm)      | 5.9 ± 0.1                          | 12.1 ± 0.2                  | 5.6 ± 0.6             | 5.9 ± 0.5     | 0.18 ± 0.02          | 0.51 ± 0.04     |
| UV-A<br>(315-400 nm)      | 27.1 ± 0.2                         | 44.9 ± 0.1                  | 6.4 ± 0.5             | 5.0 ± 0.4     | 9.7 ± 0.9            | 20 ± 1          |
| Visible<br>(400-847.5 nm) | 67.0 ± 0.2                         | 42.8 ± 0.3                  | 37 ± 3                | 12.1 ± 0.5    | 90 ± 1               | 79 ± 1          |

<sup>†</sup> Values presented are the mean in 'n' replicate measurements ± standard deviation.

<sup>§</sup> The relative proportions of the intensity of the different light sources were determined by integrating the intensity of the spectra (Figure S1) over the wavelength using the 'trapz' function in MATLAB.

<sup>§§</sup> Similarly, the relative proportions of the energy were determined by integrating the intensity of the spectra over the reciprocal wavelength.

<sup>‡</sup> Less than our estimated detection limit of 0.3%.

**Table S3.** IR assignments of variables identified by principal component 1 loadings

| Wavenumbers (cm <sup>-1</sup> ) | Contributing Polymer <sup>†</sup> | Associated Vibrational Mode                                                   | Reference |
|---------------------------------|-----------------------------------|-------------------------------------------------------------------------------|-----------|
| 3690-3120                       | wPS, (wPP, wLDPE, wHDPE)          | O-H                                                                           | 2         |
| 3079, 3059                      | pPS                               | C-H stretching                                                                |           |
| 3025                            | pPS                               | aromatic C-H stretching                                                       | 3         |
| 2914                            | p/wLDPE, p/wHDPE, (p/wPP)         | C-H stretching                                                                | 3         |
| 2847                            | p/wLDPE, p/wHDPE, (pPS, wPS)      | C-H stretching                                                                | 3         |
| 1702                            | wPS, (wPP, wLDPE, wHDPE)          | C=O groups                                                                    | 4,5       |
| 1600                            | wPS, (pPS)                        | aromatic ring stretching, conjugated C=C stretching                           | 2,3       |
| 1490                            | pPS                               | aromatic ring stretching                                                      | 3         |
| 1467                            | p/wLDPE, p/wHDPE                  | trough between 1462 and 1473 cm <sup>-1</sup> peaks (CH <sub>2</sub> bending) | 3         |
| 1411-800                        | wPS (wPP, wHDPE, wLDPE)           |                                                                               | 2         |
| 1200-1000                       | (wPP, wLDPE, wHDPE, wPS)          | C-O bonds                                                                     | 5         |
| 1024                            | wPS, (pPS)                        | aromatic CH out-of-plane bending                                              | 3         |
| 754                             | wPS, (pPS)                        |                                                                               |           |
| 724                             | p/wLDPE, p/wHDPE                  | trough between 719 and 730 cm <sup>-1</sup> peaks (CH <sub>2</sub> rocking)   | 3         |
| 694                             | wPS (pPS)                         | aromatic CH out-of-plane bending                                              | 3         |

<sup>†</sup> Weathered (w) and pristine (p) plastics. Presence of peaks in infrared (IR) spectra of the four different polymers are used to identify potential contributing polymers for each wavenumber. Polymers whose spectra most greatly resemble the PC loadings are listed first, while plastics which have minor contributions are listed secondarily in brackets.

**Table S4.** IR assignments of variables identified by principal component 2 loadings

| Wavenumbers (cm <sup>-1</sup> ) | Contributing Polymer <sup>†</sup>   | Associated Vibrational Mode                                                 | Reference |
|---------------------------------|-------------------------------------|-----------------------------------------------------------------------------|-----------|
| 3620-3225                       | wPP, wLDPE, wHDPE (wPS)             | O-H                                                                         | 2         |
| 3058                            | pPS (wPS)                           |                                                                             |           |
| 3025                            | pPS (wPS)                           | aromatic C-H stretching                                                     | 3         |
| 2953                            | p/wPP, wPP                          | trough between 2949 (C-H stretching) and 2960 cm <sup>-1</sup>              | 3         |
| 2923                            | pPS, wPS, (p/wPP, p/wLDPE, p/wHDPE) | C-H stretching                                                              | 3         |
| 2870                            | p/wPP                               | trough between 2866 and 2877 cm <sup>-1</sup>                               |           |
| 2849                            | pPS, wPS (p/wLDPE, p/wHDPE)         | C-H stretching                                                              | 3         |
| 2721                            | p/wPP                               | CH bending, CH <sub>3</sub> stretching                                      | 6         |
| 1735                            | wPP, wLDPE, wHDPE, (wPS)            | C=O groups                                                                  | 4         |
| 1598                            | pPS (wPS)                           | aromatic ring stretching, conjugated C=C stretching                         | 2,3       |
| 1490                            | pPS (wPS)                           | aromatic ring stretching                                                    | 3         |
| 1452                            | pPS, (pPP, wPP, wPS)                | CH <sub>2</sub> bending                                                     | 3,7       |
| 1375                            | p/wPP (p/wLDPE, p/wHDPE)            | CH <sub>3</sub> bending                                                     | 3         |
| 1200-1000                       | (wPP, wLDPE, wHDPE, wPS)            | C-O bonds                                                                   | 5         |
| 1165                            | pPP, (wPP)                          | CH bending, CH <sub>3</sub> rocking, C-C stretching                         | 3         |
| 996                             | p/wPP (wPS)                         | CH <sub>3</sub> rocking, CH <sub>3</sub> stretching, CH bending             | 3         |
| 972                             | p/wPP                               | CH <sub>3</sub> rocking, C-C stretching                                     | 3         |
| 841                             | p/wPP                               | CH <sub>2</sub> rocking, C-CH <sub>3</sub> stretching                       | 3         |
| 809                             | p/wPP                               | CH <sub>2</sub> rocking, C-C stretching, C-CH stretching                    | 3         |
| 753                             | pPS, (wPS)                          |                                                                             |           |
| 724                             | p/wLDPE, p/wHDPE                    | trough between 719 and 730 cm <sup>-1</sup> peaks (CH <sub>2</sub> rocking) | 3         |
| 695                             | pPS, (wPS)                          | aromatic CH out-of-plane bending                                            | 3         |

<sup>†</sup> Weathered (w) and pristine (p) plastics. Presence of peaks in IR spectra of the four different polymers are used to identify potential contributing polymers for each wavenumber. Polymers whose spectra most greatly resemble the PC loadings are listed first, while plastics which have minor contributions are listed secondarily in brackets.

## References

- 1 Vancouver Island School-Based Weather Station Network,  
[https://www.victoriaweather.ca/data\\_summary.php?id=139&year=2019](https://www.victoriaweather.ca/data_summary.php?id=139&year=2019), (accessed November 2021)
- 2 V. Fernández-González, J. M. Andrade-Garda, P. López-Mahía and S. Muniategui-Lorenzo, Impact of Weathering on the Chemical Identification of Microplastics from Usual Packaging Polymers in the Marine Environment, *Anal. Chim. Acta*, 2021, **1142**, 179–188.
- 3 M. R. Jung, F. D. Horgen, S. v. Orski, V. Rodriguez C., K. L. Beers, G. H. Balazs, T. T. Jones, T. M. Work, K. C. Brignac, S. J. Royer, K. D. Hyrenbach, B. A. Jensen and J. M. Lynch, Validation of ATR FT-IR to Identify Polymers of Plastic Marine Debris, Including Those Ingested by Marine Organisms, *Mar. Pollut. Bull.*, 2018, **127**, 704–716.
- 4 M. Hamzah, M. Khenfouch, A. Rjeb, S. Sayouri, D. S. Houssaini, M. Darhour and V. v. Srinivasu, Surface Chemistry Changes and Microstructure Evaluation of Low Density Nanocluster Polyethylene under Natural Weathering: A Spectroscopic Investigation, *J. Phys.: Conf. Ser.*, 2018, **984**, DOI: 10.1088/1742-6596/984/1/012010.
- 5 J. Brandon, M. Goldstein and M. D. Ohman, Long-Term Aging and Degradation of Microplastic Particles: Comparing in Situ Oceanic and Experimental Weathering Patterns, *Mar. Pollut. Bull.*, 2016, **110**, 299–308.
- 6 G. Grause, M. F. Chien and C. Inoue, Changes during the Weathering of Polyolefins, *Polym. Degrad. Stab.*, 2020, **181**, 109364.
- 7 E. Yousif and R. Haddad, Photodegradation and Photostabilization of Polymers, Especially Polystyrene: Review, *SpringerPlus*, 2013, **2**, 1–32.
